# Supplementary material for: Effects of transgenic Bacillus thuringiensis cotton on insecticide use, heliothine counts, plant damage, and cotton yield: A meta-analysis, 1996-2015
Source: PubMed Central journal article supplement (PMC6053876; doi:10.1371/journal.pone.0200131), 2018-07-19
Supplement: pone.0200131.s001.pdf [file pone.0200131.s001.pdf]

| Technology |                 |             |           |                  | Year(s)<br>of<br>study | Author            | State(s) | Source                                     |
|------------|-----------------|-------------|-----------|------------------|------------------------|-------------------|----------|--------------------------------------------|
| Bollgard®  | Bollgard®<br>II | WideStrike® | TwinLink® | WideStrike®<br>3 |                        |                   |          |                                            |
| x          |                 | x           |           |                  | 2002                   | Adamczyk et al.   | MS       | Proc. 2002 Beltwide Cotton Conf. 1567-1571 |
| x          | x               |             |           |                  | 2000                   | Adamczyk et al.   | MS       | J. Econ. Entomol. 94(6): 1589-1593         |
| x          | x               |             |           |                  | 2000                   | Adamczyk et al.   | MS       | Proc. 2001 Beltwide Cotton Conf. 835-836   |
| x          | x               |             |           |                  | 2000-2001              | Akin et al.       | MS       | Proc. 2002 Beltwide Cotton Conf.           |
|            | x               | x           |           |                  | 2002 and 2004-2005     | Ali and Braxton   | GA       | Proc. 2006 Beltwide Cotton Conf. 1095-1099 |
| x          | x               |             |           |                  | 1999                   | Allen et al.      | AR       | Proc. 2000 Beltwide Cotton Conf. 1093-1094 |
| x          |                 |             |           |                  | 1996 and 1998          | Allen et al.      | AR       | Arthropod Manage. Tests 25(1): M15         |
| x          | x               |             |           |                  | 2006                   | Bachelor and Mott | NC       | Arthropod Manage. Tests 32(1): F21         |
| x          | x               |             |           |                  | 2000                   | Bachelor and Mott | NC       | Arthropod Manage. Tests 26(1): M8          |
| x          | x               |             |           |                  | 2002                   | Bachelor and Mott | NC       | Arthropod Manage. Tests 28(1): F41a        |
| x          | x               |             |           |                  | 2003                   | Bachelor and Mott | NC       | Arthropod Manage. Tests 29(1): F42         |
| x          | x               |             |           |                  | 2001                   | Bachelor and Mott | NC       | Arthropod Manage. Tests 27(1): M5          |
| x          | x               |             |           |                  | 2000                   | Bachelor and Mott | NC       | Proc. 2003 Beltwide Cotton Conf. 1011-1014 |
| x          |                 |             |           |                  | 1998                   | Bachelor and Mott | NC       | Arthropod Manage. Tests 24(1): F50         |
|            |                 | x           |           |                  | 2003                   | Bachelor and Mott | NC       | Proc. 2004 Beltwide Cotton Conf. 1365-1368 |

|   |   |   |   |   |  |           |                     |    |                                            |
|---|---|---|---|---|--|-----------|---------------------|----|--------------------------------------------|
| x | x | x |   |   |  | 2005      | Bachelor et al.     | NC | Proc. 2006 Beltwide Cotton Conf. 1536-1540 |
| x |   |   |   |   |  | 1996      | Benedict et al.     | TX | Arthropod Manage. Tests 24(1): M19         |
| x |   |   |   |   |  | 1996      | Benedict et al.     | TX | Arthropod Manage. Tests 24(1): F52         |
| x |   |   |   |   |  | 1998-1999 | Brickle et al.      | SC | J. Econ. Entomol. 94(1): 86-92             |
| x | x |   |   |   |  | 2002      | Burris et al.       | LA | Arthropod Manage. Tests 28(1): M6          |
| x |   |   |   |   |  | 1996      | Burris et al.       | LA | Proc. 1997 Beltwide Cotton Conf. 867-870   |
| x |   |   |   |   |  | 1998      | Capps et al.        | AR | Proc. 1999 Beltwide Cotton Conf. 1239-1241 |
|   | x | x |   |   |  | 2010      | Carter et al.       | SC | Proc. 2011 Beltwide Cotton Conf. 1031-1038 |
|   |   | x |   |   |  | 2007      | Castro              | TX | Arthropod Manage. Tests 33(1): M1          |
|   | x | x | x | x |  | 2007-2014 | Catchot             | MS | Unpublished                                |
| x | x |   |   |   |  | 2000-2001 | Chitkowski et al.   | SC | J. Econ. Entomol. 96(3): 755-762           |
|   | x | x |   |   |  | 2007      | Cook et al.         | MS | Proc. 2008 Beltwide Cotton Conf. 1065-1069 |
| x |   |   |   |   |  | 2001-2003 | Gable               | LA | Louisiana State University Thesis          |
|   | x | x |   |   |  | 2005-2015 | Gore                | MS | Unpublished                                |
| x | x | x | x | x |  | 2007-2015 | Greene              | SC | Unpublished                                |
| x | x | x |   |   |  | 2006-2009 | Greene and Robinson | SC | Proc. 2010 Beltwide Cotton Conf. 1297-1302 |
| x | x |   |   |   |  | 2000-2002 | Hagerty et al.      | SC | Environ. Entomol. 34(1): 105-114           |
| x | x |   |   |   |  | 2001-2002 | Hagerty et al.      | SC | Proc. 2003 Beltwide Cotton Conf. 1161-1162 |

|   |   |  |   |   |   |           |                |                |                                            |
|---|---|--|---|---|---|-----------|----------------|----------------|--------------------------------------------|
| x | x |  |   |   |   | 2006      | Hardke et al.  | AR             | Arthropod Manage. Tests 33(1): F23         |
| x |   |  |   |   |   | 2001-2002 | Head et al.    | AL, GA, SC     | Environ. Entomol. 34(5): 1257-1266         |
| x |   |  |   |   |   | 2001      | Hopkins et al. | AR             | Proc. 2002 Beltwide Cotton Conf.           |
|   |   |  | x |   |   | 2004      | Huckaba et al. | GA, NC, SC, VA | Proc. 2005 Beltwide Cotton Conf. 1252-1259 |
|   |   |  | x |   |   | 2001-2002 | Huckaba et al. | AL, LA, NC     | Proc. 2003 Beltwide Cotton Conf. 1293-1298 |
| x | x |  | x |   |   | 2004      | Jackson et al. | NC             | Proc. 2005 Beltwide Cotton Conf. 1373-1378 |
| x | x |  |   |   |   | 1999      | Jackson et al. | NC             | Proc. 2000 Beltwide Cotton Conf. 1048-1052 |
| x | x |  |   |   |   | 2000      | Jackson et al. | NC             | Proc. 2001 Beltwide Cotton Conf. 815-818   |
|   | x |  | x |   |   | 2005      | Jackson et al. | NC             | Proc. 2006 Beltwide Cotton Conf. 1531-1535 |
| x | x |  |   |   |   | 2002      | Johnson et al. | AR             | AAES Research Series 507                   |
| x | x |  |   |   |   | 2001      | Johnson et al. | AR             | Arthropod Manage. Tests 28(1): M10         |
| x | x |  |   |   |   | 2001-2002 | Johnson et al. | AR             | Proc. 2003 Beltwide Cotton Conf. 1478-1480 |
| x |   |  |   |   |   | 2001      | Johnson et al. | AR             | Arthropod Manage. Tests 28(1): F57         |
|   | x |  | x | x | x | 2008-2015 | Kerns          | LA             | Unpublished                                |
|   | x |  | x | x | x | 2014      | Kerns et al.   | AR, LA, MS, TN | Proc. 2015 Beltwide Cotton Conf. 819-829   |
| x |   |  |   |   |   | 2001      | Layton et al.  | MS             | Proc. 2002 Beltwide Cotton Conf.           |
| x |   |  |   |   |   | 1998      | Layton et al.  | MS             | Proc. 1999 Beltwide Cotton Conf. 942-945   |

|   |   |   |   |   |   |               |                       |    |                                                  |
|---|---|---|---|---|---|---------------|-----------------------|----|--------------------------------------------------|
| x |   |   |   |   |   | 1997          | Layton et al.         | MS | Proc. 1998<br>Beltwide Cotton<br>Conf. 970-973   |
| x |   |   |   |   |   | 1996          | Layton et al.         | MS | Proc. 1997<br>Beltwide Cotton<br>Conf. 861-863   |
| x |   |   |   |   |   | 1999          | Layton et al.         | MS | Proc. 2000<br>Beltwide Cotton<br>Conf. 1037-1039 |
| x |   |   |   |   |   | 2000          | Layton et al.         | MS | Proc. 2001<br>Beltwide Cotton<br>Conf. 847-849   |
| x | x |   |   |   |   | 2000          | Lentz et al.          | TN | Proc. 2001<br>Beltwide Cotton<br>Conf. 849-850   |
| x |   |   |   |   |   | 1996          | Leonard et<br>al.     | LA | Proc. 1997<br>Beltwide Cotton<br>Conf. 863-867   |
| x |   |   |   |   |   | 1997          | Leonard et<br>al.     | LA | Proc. 1998<br>Beltwide Cotton<br>Conf. 967-971   |
| x | x | x | x | x | x | 2008-<br>2015 | Lorenz                | AR | Unpublished<br>Proc. 2001                        |
| x | x |   |   |   |   | 2000          | Lorenz et al.         | AR | Beltwide Cotton<br>Conf. 1116-1117               |
|   |   |   | x |   |   | 2006          | Lorenz et al.         | AR | AAES Research<br>Series 552<br>Proc. 2003        |
| x |   |   |   |   |   | 2002          | Lorenz et al.         | AR | Beltwide Cotton<br>Conf. 1470-1472<br>Proc. 2008 |
| x | x | x |   |   |   | 2006-<br>2007 | Malone and<br>Herbert | VA | Beltwide Cotton<br>Conf. 1035-1042<br>Proc. 2001 |
| x |   |   |   |   |   | 2000          | McGriff et<br>al.     | GA | Beltwide Cotton<br>Conf. 431-432<br>Proc. 2003   |
| x |   |   |   |   |   | 2002          | McGriff et<br>al.     | GA | Beltwide Cotton<br>Conf. 850-854<br>Proc. 2006   |
|   | x | x |   |   |   | 2005          | Micinski et<br>al.    | LA | Beltwide Cotton<br>Conf. 1090-1094               |
|   | x |   |   |   |   | 2014-<br>2015 | Musser                | MS | Unpublished<br>Proc. 2014                        |
|   | x | x |   |   |   | 2011-<br>2012 | Orellana et<br>al.    | AR | Beltwide Cotton<br>Conf. 842-845                 |

|   |   |   |   |   |   |           |                        |                            |                                            |
|---|---|---|---|---|---|-----------|------------------------|----------------------------|--------------------------------------------|
| x | x |   |   |   |   | 2003-2004 | Parajulee              | TX                         | Unpublished                                |
| x |   |   |   |   |   | 2002      | Parker                 | TX                         | Texas Cooperative Extension                |
|   |   |   | x |   |   | 2004      | Parker                 | TX                         | Texas Cooperative Extension                |
|   |   |   | x |   |   | 2004      | Parker and Livingston  | TX                         | Proc. 2005 Beltwide Cotton Conf. 1687-1693 |
| x |   |   |   |   |   | 1997-1998 | Pietrantonio and Heinz | TX                         | Proc. 1999 Beltwide Cotton Conf. 945-948   |
| x |   |   |   |   |   | 1998-1999 | Reed et al.            | MS                         | Proc. 2001 Beltwide Cotton Conf. 1131-1132 |
|   | x | x |   | x | x | 2011-2015 | Reisig                 | NC                         | Unpublished                                |
| x |   |   |   |   |   | 1996      | Scott et al.           | MS                         | Proc. 1997 Beltwide Cotton Conf. 892-896   |
| x |   |   |   |   |   | 1998-1999 | Seward et al.          | TN                         | Proc. 2000 Beltwide Cotton Conf. 1055-1058 |
|   |   |   | x |   |   | 2003      | Siebert et al.         | AR, GA, LA, MO, MS, NC, SC | J. Econ. Entomol. 101(6): 1950-1959        |
|   |   |   | x |   |   | 2006      | Siebert et al.         | AR, LA, NC                 | Proc. 2007 Beltwide Cotton Conf. 1114-1118 |
|   |   |   | x |   |   | 2003-2004 | Smith et al.           | AL                         | Proc. 2005 Beltwide Cotton Conf. 1330-1335 |
| x | x |   |   |   |   | 2003      | Smith et al.           | AR                         | Proc. 2004 Beltwide Cotton Conf. 1852-1853 |
| x |   |   |   |   |   | 2002      | Sparks et al.          | AR                         | Proc. 2002 Beltwide Cotton Conf.           |
|   | x | x |   | x | x | 2011-2015 | Stewart                | TN                         | Unpublished                                |
| x |   |   |   |   |   | 1999      | Stewart et al.         | MS                         | Proc. 2000 Beltwide Cotton Conf. 1043-1049 |
|   | x | x |   | x | x | 2014      | Taillon et al.         | AR                         | Proc. 2015 Beltwide Cotton Conf. 252-255   |

|   |   |   |  |   |           |                      |    |                                                  |
|---|---|---|--|---|-----------|----------------------|----|--------------------------------------------------|
| x | x | x |  | x | 2003-2011 | Taylor               | VA | Unpublished                                      |
| x | x |   |  |   | 2004      | Tritt                | TN | Proc. 2005<br>Beltwide Cotton<br>Conf. 1443-1445 |
| x | x |   |  |   | 2004      | Tritt and<br>Burcham | TN | Proc. 2004<br>Beltwide Cotton<br>Conf. 1354-1357 |
| x | x |   |  |   | 2000      | Turnipseed<br>et al. | SC | Proc. 2001<br>Beltwide Cotton<br>Conf. 1009      |
