# Supplementary material for: Effects of transgenic Bacillus thuringiensis cotton on insecticide use, heliothine counts, plant damage, and cotton yield: A meta-analysis, 1996-2015
Source: PubMed Central journal article supplement (PMC6053876; doi:10.1371/journal.pone.0200131), 2018-07-19
Supplement: pone.0200131.s002.pdf [file pone.0200131.s002.pdf]

| Insecticide usage        | Blanket <sup>5</sup> |                   |                       |          |             | None             |                   |                       |          |                  | Threshold <sup>5</sup> |                  |                   |                       |          |             |
|--------------------------|----------------------|-------------------|-----------------------|----------|-------------|------------------|-------------------|-----------------------|----------|------------------|------------------------|------------------|-------------------|-----------------------|----------|-------------|
|                          | Publication Type     |                   |                       |          |             |                  |                   |                       |          |                  |                        |                  |                   |                       |          |             |
| Region and Technology    | AMT <sup>1</sup>     | BWCC <sup>2</sup> | Ext. pub <sup>3</sup> | Refereed | Unpublished | AMT <sup>1</sup> | BWCC <sup>2</sup> | Ext. pub <sup>3</sup> | Refereed | T/D <sup>4</sup> | Unpublished            | AMT <sup>1</sup> | BWCC <sup>2</sup> | Ext. pub <sup>3</sup> | Refereed | Unpublished |
| <b>Midsouth</b>          |                      |                   |                       |          |             |                  |                   |                       |          |                  |                        |                  |                   |                       |          |             |
| Bollgard®                | 10                   | 50                | 3                     | 0        | 0           | 18               | 65                | 3                     | 1        | 6                | 18                     | 33               | 58                | 0                     | 0        | 0           |
| Bollgard® II             | 0                    | 32                | 3                     | 0        | 158         | 2                | 36                | 3                     | 0        | 0                | 256                    | 0                | 0                 | 3                     | 0        | 0           |
| WideStrike®              | 0                    | 24                | 3                     | 0        | 138         | 0                | 41                | 17                    | 0        | 0                | 220                    | 0                | 0                 | 3                     | 0        | 0           |
| WideStrike® 3            | 0                    | 0                 | 3                     | 0        | 14          | 0                | 0                 | 7                     | 0        | 0                | 24                     | 0                | 0                 | 0                     | 0        | 0           |
| TwinLink®                | 0                    | 11                | 3                     | 0        | 26          | 0                | 11                | 3                     | 0        | 0                | 33                     | 0                | 0                 | 0                     | 0        | 0           |
| <b>Southeast</b>         |                      |                   |                       |          |             |                  |                   |                       |          |                  |                        |                  |                   |                       |          |             |
| Bollgard®                | 16                   | 10                | 0                     | 18       | 0           | 12               | 36                | 0                     | 27       | 0                | 11                     | 2                | 9                 | 0                     | 51       | 2           |
| Bollgard® II             | 2                    | 25                | 0                     | 0        | 34          | 4                | 65                | 0                     | 0        | 0                | 106                    | 0                | 10                | 0                     | 0        | 2           |
| WideStrike®              | 0                    | 18                | 0                     | 0        | 13          | 0                | 59                | 0                     | 0        | 0                | 112                    | 0                | 10                | 0                     | 0        | 11          |
| WideStrike® 3            | 0                    | 0                 | 0                     | 0        | 4           | 0                | 0                 | 0                     | 0        | 0                | 19                     | 0                | 0                 | 0                     | 0        | 0           |
| TwinLink®                | 0                    | 0                 | 0                     | 0        | 4           | 0                | 0                 | 0                     | 0        | 0                | 28                     | 0                | 0                 | 0                     | 0        | 0           |
| <b>Texas<sup>6</sup></b> |                      |                   |                       |          |             |                  |                   |                       |          |                  |                        |                  |                   |                       |          |             |
| Bollgard®                | 4                    | 0                 | 22                    | 0        | 10          | 16               | 11                | 7                     | 0        | 0                | 15                     | 0                | 0                 | 0                     | 0        | 5           |
| Bollgard® II             | 0                    | 0                 | 0                     | 0        | 10          | 8                | 0                 | 0                     | 0        | 0                | 15                     | 0                | 0                 | 0                     | 0        | 5           |
| WideStrike®              | 0                    | 0                 | 0                     | 0        | 0           | 16               | 0                 | 0                     | 0        | 0                | 0                      | 0                | 0                 | 0                     | 0        | 0           |
