# Supplementary material for: Effects of transgenic Bacillus thuringiensis cotton on insecticide use, heliothine counts, plant damage, and cotton yield: A meta-analysis, 1996-2015
Source: PubMed Central journal article supplement (PMC6053876; doi:10.1371/journal.pone.0200131), 2018-07-19
Supplement: pone.0200131.s003.pdf [file pone.0200131.s003.pdf]

| Insecticide usage              | Blanket <sup>5</sup> |                   |                       |          |             | None             |                   |                       |          |                  | Threshold <sup>5</sup> |                  |                   |                       |          |             |
|--------------------------------|----------------------|-------------------|-----------------------|----------|-------------|------------------|-------------------|-----------------------|----------|------------------|------------------------|------------------|-------------------|-----------------------|----------|-------------|
|                                | Publication Type     |                   |                       |          |             |                  |                   |                       |          |                  |                        |                  |                   |                       |          |             |
| Region and Comparison          | AMT <sup>1</sup>     | BWCC <sup>2</sup> | Ext. pub <sup>3</sup> | Referred | Unpublished | AMT <sup>1</sup> | BWCC <sup>2</sup> | Ext. pub <sup>3</sup> | Referred | T/D <sup>4</sup> | Unpublished            | AMT <sup>1</sup> | BWCC <sup>2</sup> | Ext. pub <sup>3</sup> | Referred | Unpublished |
| <b>Midsouth</b>                |                      |                   |                       |          |             |                  |                   |                       |          |                  |                        |                  |                   |                       |          |             |
| Bollgard® and Bollgard® II     | 6                    | 35                | 3                     | 0        | 0           | 9                | 37                | 3                     | 1        | 0                | 18                     | 0                | 6                 | 0                     | 0        | 0           |
| Bollgard® and WideStrike®      | 0                    | 0                 | 0                     | 0        | 0           | 0                | 3                 | 0                     | 0        | 0                | 18                     | 0                | 0                 | 0                     | 0        | 0           |
| Bollgard® II and WideStrike®   | 0                    | 22                | 3                     | 0        | 128         | 0                | 29                | 3                     | 0        | 0                | 159                    | 0                | 0                 | 3                     | 0        | 0           |
| Bollgard® II and WideStrike® 3 | 0                    | 11                | 3                     | 0        | 23          | 0                | 11                | 3                     | 0        | 0                | 24                     | 0                | 0                 | 0                     | 0        | 0           |
| Bollgard® II and TwinLink®     | 0                    | 11                | 3                     | 0        | 23          | 0                | 11                | 3                     | 0        | 0                | 37                     | 0                | 0                 | 0                     | 0        | 0           |
| WideStrike® and WideStrike® 3  | 0                    | 11                | 3                     | 0        | 33          | 0                | 11                | 11                    | 0        | 0                | 70                     | 0                | 0                 | 0                     | 0        | 0           |
| WideStrike® and TwinLink®      | 0                    | 11                | 3                     | 0        | 26          | 0                | 11                | 3                     | 0        | 0                | 28                     | 0                | 0                 | 0                     | 0        | 0           |
| WideStrike® 3 and TwinLink®    | 0                    | 11                | 3                     | 0        | 26          | 0                | 11                | 3                     | 0        | 0                | 28                     | 0                | 0                 | 0                     | 0        | 0           |
| <b>Southeast</b>               |                      |                   |                       |          |             |                  |                   |                       |          |                  |                        |                  |                   |                       |          |             |
| Bollgard® and Bollgard® II     | 16                   | 10                | 0                     | 0        | 0           | 10               | 31                | 0                     | 24       | 0                | 11                     | 0                | 2                 | 0                     | 0        | 0           |
| Bollgard® and WideStrike®      | 0                    | 2                 | 0                     | 0        | 0           | 0                | 20                | 0                     | 0        | 0                | 6                      | 0                | 0                 | 0                     | 0        | 2           |
| Bollgard® II and WideStrike®   | 0                    | 21                | 0                     | 0        | 13          | 0                | 59                | 0                     | 0        | 0                | 40                     | 0                | 8                 | 0                     | 0        | 2           |
| Bollgard® II and WideStrike® 3 | 0                    | 0                 | 0                     | 0        | 8           | 0                | 0                 | 0                     | 0        | 0                | 15                     | 0                | 0                 | 0                     | 0        | 0           |
| Bollgard® 2 and TwinLink®      | 0                    | 0                 | 0                     | 0        | 4           | 0                | 0                 | 0                     | 0        | 0                | 47                     | 0                | 0                 | 0                     | 0        | 0           |
| WideStrike® and WideStrike® 3  | 0                    | 0                 | 0                     | 0        | 8           | 0                | 0                 | 0                     | 0        | 0                | 57                     | 0                | 0                 | 0                     | 0        | 0           |
| WideStrike® and TwinLink®      | 0                    | 0                 | 0                     | 0        | 4           | 0                | 0                 | 0                     | 0        | 0                | 19                     | 0                | 0                 | 0                     | 0        | 0           |
| WideStrike® 3 and TwinLink®    | 0                    | 0                 | 0                     | 0        | 4           | 0                | 0                 | 0                     | 0        | 0                | 9                      | 0                | 0                 | 0                     | 0        | 0           |
| <b>Texas<sup>6</sup></b>       |                      |                   |                       |          |             |                  |                   |                       |          |                  |                        |                  |                   |                       |          |             |
| Bollgard® and Bollgard® II     | 0                    | 0                 | 0                     | 0        | 10          | 8                | 1                 | 0                     | 0        | 0                | 15                     | 0                | 0                 | 0                     | 0        | 0           |
