# Supplementary material for: Effects of transgenic Bacillus thuringiensis cotton on insecticide use, heliothine counts, plant damage, and cotton yield: A meta-analysis, 1996-2015
Source: PubMed Central journal article supplement (PMC6053876; doi:10.1371/journal.pone.0200131), 2018-07-19
Supplement: pone.0200131.s004.pdf [file pone.0200131.s004.pdf]

| Region and Technology    | Counts |         |                    |         |           |                          | Damage |         |                    |         |           |                          | Yield |
|--------------------------|--------|---------|--------------------|---------|-----------|--------------------------|--------|---------|--------------------|---------|-----------|--------------------------|-------|
|                          | Bolls  | Flowers | Repro <sup>1</sup> | Squares | Terminals | Whole plant <sup>2</sup> | Bolls  | Flowers | Repro <sup>1</sup> | Squares | Terminals | Whole plant <sup>2</sup> |       |
| <b>Midsouth</b>          |        |         |                    |         |           |                          |        |         |                    |         |           |                          |       |
| <b>Bollgard®</b>         | 2      | 6       | 1                  | 21      | 16        | 23                       | 39     | 6       | 1                  | 46      | 15        | 6                        | 83    |
| <b>Bollgard® II</b>      | 36     | 26      | 8                  | 32      | 22        | 18                       | 82     | 37      | 17                 | 75      | 50        | 2                        | 88    |
| <b>WideStrike®</b>       | 28     | 22      | 10                 | 30      | 20        | 19                       | 66     | 36      | 17                 | 68      | 48        | 3                        | 79    |
| <b>WideStrike® 3</b>     | 2      | 0       | 4                  | 1       | 0         | 0                        | 9      | 5       | 0                  | 9       | 8         | 0                        | 10    |
| <b>TwinLink®</b>         | 3      | 0       | 4                  | 1       | 0         | 0                        | 12     | 6       | 12                 | 13      | 11        | 0                        | 25    |
| <b>Southeast</b>         |        |         |                    |         |           |                          |        |         |                    |         |           |                          |       |
| <b>Bollgard®</b>         | 9      | 3       | 0                  | 4       | 0         | 92                       | 29     | 0       | 4                  | 6       | 1         | 0                        | 46    |
| <b>Bollgard® II</b>      | 26     | 4       | 0                  | 19      | 2         | 7                        | 70     | 3       | 0                  | 32      | 15        | 0                        | 70    |
| <b>WideStrike®</b>       | 17     | 6       | 0                  | 11      | 4         | 10                       | 55     | 11      | 0                  | 28      | 18        | 0                        | 63    |
| <b>WideStrike® 3</b>     | 0      | 0       | 0                  | 0       | 0         | 2                        | 5      | 3       | 0                  | 5       | 5         | 0                        | 3     |
| <b>TwinLink®</b>         | 4      | 0       | 0                  | 4       | 0         | 0                        | 7      | 1       | 0                  | 7       | 3         | 0                        | 6     |
| <b>Texas<sup>3</sup></b> |        |         |                    |         |           |                          |        |         |                    |         |           |                          |       |
| <b>Bollgard®</b>         | 2      | 2       | 2                  | 17      | 3         | 9                        | 11     | 7       | 0                  | 23      | 3         | 1                        | 10    |
| <b>Bollgard® II</b>      | 1      | 1       | 0                  | 1       | 1         | 6                        | 7      | 6       | 0                  | 7       | 1         | 0                        | 7     |
| <b>WideStrike®</b>       | 2      | 2       | 0                  | 2       | 2         | 0                        | 2      | 0       | 0                  | 2       | 2         | 0                        | 2     |
