# Supplementary material for: Effects of transgenic Bacillus thuringiensis cotton on insecticide use, heliothine counts, plant damage, and cotton yield: A meta-analysis, 1996-2015
Source: PubMed Central journal article supplement (PMC6053876; doi:10.1371/journal.pone.0200131), 2018-07-19
Supplement: pone.0200131.s005.pdf [file pone.0200131.s005.pdf]

| Region and Technology          | Counts |         |                    |         |           |                          | Damage |         |                    |         |           |                          | Yield |
|--------------------------------|--------|---------|--------------------|---------|-----------|--------------------------|--------|---------|--------------------|---------|-----------|--------------------------|-------|
|                                | Bolls  | Flowers | Repro <sup>1</sup> | Squares | Terminals | Whole plant <sup>2</sup> | Bolls  | Flowers | Repro <sup>1</sup> | Squares | Terminals | Whole plant <sup>2</sup> |       |
| <b>Midsouth</b>                |        |         |                    |         |           |                          |        |         |                    |         |           |                          |       |
| Bollgard® and Bollgard® II     | 2      | 6       | 0                  | 5       | 8         | 17                       | 15     | 6       | 0                  | 21      | 7         | 2                        | 29    |
| Bollgard® and WideStrike®      | 2      | 2       | 0                  | 2       | 2         | 0                        | 3      | 2       | 0                  | 3       | 2         | 0                        | 3     |
| Bollgard® II and WideStrike®   | 27     | 21      | 4                  | 26      | 18        | 14                       | 46     | 29      | 17                 | 48      | 39        | 1                        | 57    |
| Bollgard® II and WideStrike® 3 | 2      | 0       | 4                  | 0       | 0         | 0                        | 9      | 6       | 12                 | 10      | 10        | 0                        | 22    |
| Bollgard® II and TwinLink®     | 3      | 0       | 6                  | 1       | 0         | 0                        | 12     | 6       | 12                 | 13      | 10        | 0                        | 25    |
| WideStrike® and WideStrike® 3  | 2      | 1       | 10                 | 3       | 1         | 1                        | 21     | 13      | 12                 | 24      | 18        | 0                        | 33    |
| WideStrike® and TwinLink®      | 2      | 0       | 4                  | 0       | 0         | 0                        | 11     | 6       | 12                 | 12      | 11        | 0                        | 24    |
| WideStrike® 3 and TwinLink®    | 2      | 0       | 4                  | 0       | 0         | 0                        | 11     | 6       | 12                 | 12      | 11        | 0                        | 24    |
| <b>Southeast</b>               |        |         |                    |         |           |                          |        |         |                    |         |           |                          |       |
| Bollgard® and Bollgard® II     | 8      | 3       | 0                  | 3       | 0         | 19                       | 25     | 0       | 4                  | 4       | 0         | 0                        | 40    |
| Bollgard® and WideStrike®      | 1      | 0       | 0                  | 3       | 0         | 2                        | 9      | 0       | 0                  | 5       | 1         | 0                        | 9     |
| Bollgard® II and WideStrike®   | 13     | 0       | 0                  | 7       | 0         | 7                        | 39     | 3       | 0                  | 19      | 8         | 0                        | 47    |
| Bollgard® II and WideStrike® 3 | 0      | 0       | 0                  | 0       | 0         | 0                        | 6      | 1       | 0                  | 5       | 5         | 0                        | 6     |
| Bollgard® II and TwinLink®     | 7      | 0       | 0                  | 7       | 0         | 0                        | 13     | 1       | 0                  | 10      | 4         | 0                        | 9     |
| WideStrike® and WideStrike® 3  | 3      | 3       | 0                  | 4       | 3         | 2                        | 12     | 6       | 0                  | 11      | 11        | 0                        | 10    |
| WideStrike® and TwinLink®      | 2      | 0       | 0                  | 2       | 0         | 0                        | 5      | 1       | 0                  | 5       | 3         | 0                        | 5     |
| WideStrike® 3 and TwinLink®    | 0      | 0       | 0                  | 0       | 0         | 0                        | 3      | 1       | 0                  | 3       | 3         | 0                        | 3     |
| <b>Texas<sup>6</sup></b>       |        |         |                    |         |           |                          |        |         |                    |         |           |                          |       |
| Bollgard® and Bollgard® II     | 1      | 1       | 0                  | 1       | 1         | 7                        | 7      | 6       | 0                  | 7       | 1         | 0                        | 7     |
