# Supplementary material for: Effects of transgenic Bacillus thuringiensis cotton on insecticide use, heliothine counts, plant damage, and cotton yield: A meta-analysis, 1996-2015
Source: PubMed Central journal article supplement (PMC6053876; doi:10.1371/journal.pone.0200131), 2018-07-19
Supplement: pone.0200131.s006.pdf [file pone.0200131.s006.pdf]

| Comparison <sup>1</sup> | Response type | Effect            | df <sup>2</sup> | F/t    | p       | % change <sup>3</sup> |
|-------------------------|---------------|-------------------|-----------------|--------|---------|-----------------------|
| Bollgard: non-Bt        | Counts        | Overall intercept | 41              | -6.50  | <0.0001 | 49.0                  |
|                         |               | Plant part        | 3, 38           | 0.46   | 0.7123  |                       |
|                         |               | Region            | 2, 39           | 0.45   | 0.6425  |                       |
|                         |               | Year              | 2, 37           | 1.82   | 0.1764  |                       |
|                         |               | Year*plant part   | n/e             | n/e    | n/e     |                       |
|                         |               | Year*region       | n/e             | n/e    | n/e     |                       |
|                         | Damage        | Overall intercept | 88              | -16.55 | <0.0001 | 70.2                  |
|                         |               | Plant part        | 3, 86           | 2.79   | 0.0454  |                       |
|                         |               | Bolls             |                 |        |         | 71.9                  |
|                         |               | Flowers           |                 |        |         | 48.2                  |
|                         |               | Squares           |                 |        |         | 74.7                  |
|                         |               | Terminals         |                 |        |         | 61.7                  |
|                         |               | Region            | 2, 87           | 3.33   | 0.0404  |                       |
|                         |               | Midsouth          |                 |        |         | 64.6                  |
|                         |               | Southeast         |                 |        |         | 75.4                  |
|                         |               | Texas             |                 |        |         | 76.5                  |
|                         |               | Year              | 2, 83           | 0.40   | 0.6728  |                       |
|                         |               | Year*plant part   | 2, 66           | 0.08   | 0.92    |                       |
|                         | Year*region   | 2, 58             | 2.99            | 0.0579 |         |                       |
|                         | Yield         | Overall intercept | 59              | 5.82   | <0.0001 | 43.8                  |
|                         |               | Region            | 2, 57           | 3.37   | 0.0415  |                       |
| Midsouth                |               |                   |                 |        | 24.6    |                       |
| Southeast               |               |                   |                 |        | 73.4    |                       |
| Texas                   |               |                   |                 |        | 43.0    |                       |
| Year                    |               | 2, 54             | 1.82            | 0.1717 |         |                       |
| Year*region             | n/e           | n/e               | n/e             |        |         |                       |
| Bollgard II: non-Bt     | Counts        | Overall intercept | 111             | -12.94 | <0.0001 | 61.8                  |
|                         |               | Plant part        | 3, 108          | 2.50   | 0.0633  |                       |
|                         |               | Region            | 1, 106          | 11.16  | 0.0012  |                       |
|                         |               | Midsouth          |                 |        |         | 56.8                  |
|                         |               | Southeast         |                 |        |         | 73.8                  |
|                         |               | Year              | 2, 108          | 12.31  | <0.0001 |                       |
|                         |               | Year*plant part   | 2, 65           | 0.95   | 0.3916  |                       |
|                         |               | Year*region       | 2, 101          | 6.62   | 0.002   |                       |
|                         | Damage        | Overall intercept | 249             | -34.03 | <0.0001 | 81.4                  |
|                         |               | Plant part        | 3, 246          | 3.27   | 0.022   |                       |
|                         |               | Bolls             |                 |        |         | 83.3                  |
|                         |               | Flowers           |                 |        |         | 74.4                  |
|                         |               | Squares           |                 |        |         | 82.7                  |
|                         |               | Terminals         |                 |        |         | 77.1                  |

|                             |        |                   |        |        |         |      |
|-----------------------------|--------|-------------------|--------|--------|---------|------|
|                             |        | Region            | 2, 247 | 6.59   | 0.0016  |      |
|                             |        | Midsouth          |        |        |         | 78.9 |
|                             |        | Southeast         |        |        |         | 85.5 |
|                             |        | Texas             |        |        |         | 85.1 |
|                             |        | Year              | 2, 247 | 3.29   | 0.0388  |      |
|                             |        | Year*plant part   | 2, 183 | 0.43   | 0.6511  |      |
|                             |        | Year*region       | 2, 233 | 6.45   | 0.0019  |      |
|                             | Yield  | Overall intercept | 97     | 9.03   | <0.0001 | 59.9 |
|                             |        | Region            | 1, 93  | 4.92   | 0.0289  |      |
|                             |        | Midsouth          |        |        |         | 48.3 |
|                             |        | Southeast         |        |        |         | 90.4 |
|                             |        | Year              | 2, 96  | 7.71   | 0.0008  |      |
|                             |        | Year*region       | 2, 84  | 4.48   | 0.0141  |      |
| <b>WideStrike: non-Bt</b>   | Counts | Overall intercept | 97     | -12.52 | <0.0001 | 47.4 |
|                             |        | Plant part        | 3, 94  | 1.38   | 0.2533  |      |
|                             |        | Region            | 2, 95  | 14.23  | <0.0001 |      |
|                             |        | Midsouth          |        |        |         | 48.4 |
|                             |        | Southeast         |        |        |         | 58.4 |
|                             |        | Texas             |        |        |         | 7.8  |
|                             |        | Year              | 2, 95  | 0.29   | 0.7468  |      |
|                             |        | Year*plant part   | 2, 52  | 1.11   | 0.3375  |      |
|                             |        | Year*region       | 2, 84  | 12.90  | <0.0001 |      |
|                             | Damage | Overall intercept | 240    | -28.58 | <0.0001 | 68.4 |
|                             |        | Plant part        | 3, 237 | 0.55   | 0.6456  |      |
|                             |        | Region            | 2, 238 | 2.56   | 0.0795  |      |
|                             |        | Year              | 2, 238 | 4.02   | 0.0192  |      |
|                             |        | Year*plant part   | 6, 220 | 0.43   | 0.8608  |      |
|                             |        | Year*region       | 2, 229 | 7.09   | 0.001   |      |
|                             | Yield  | Overall intercept | 89     | 8.65   | <0.0001 | 54.2 |
|                             |        | Region            | 1, 86  | 2.28   | 0.1347  |      |
|                             |        | Year              | 2, 87  | 5.45   | 0.0059  |      |
|                             |        | Year*region       | 2, 79  | 0.70   | 0.5001  |      |
| <b>WideStrike 3: non-Bt</b> | Counts | Overall intercept | n/e    | n/e    | n/e     |      |
|                             |        | Plant part        | n/e    | n/e    | n/e     |      |
|                             |        | Region            | n/e    | n/e    | n/e     |      |
|                             | Damage | Overall intercept | 34     | -8.80  | <0.0001 | 79.7 |
|                             |        | Plant part        | 3, 31  | 0.86   | 0.4736  |      |
|                             |        | Region            | 1, 33  | 8.32   | 0.0068  |      |
|                             |        | Midsouth          |        |        |         | 70.7 |
|                             |        | Southeast         |        |        |         | 89.0 |
|                             | Yield  | Overall intercept | 7      | 4.18   | 0.0041  | 23.0 |
|                             |        | Region            | n/e    | n/e    | n/e     |      |

|                                |               |                          |        |        |         |      |
|--------------------------------|---------------|--------------------------|--------|--------|---------|------|
| <b>TwinLink: non-Bt</b>        | <b>Counts</b> | <b>Overall intercept</b> | 10     | -6.62  | <0.0001 | 69.3 |
|                                |               | <b>Plant part</b>        | 1, 9   | 0.03   | 0.8615  |      |
|                                |               | <b>Region</b>            | n/e    | n/e    | n/e     |      |
|                                | <b>Damage</b> | <b>Overall intercept</b> | 37     | -11.37 | <0.0001 | 71.8 |
|                                |               | <b>Plant part</b>        | 2, 31  | 0.71   | 0.5008  |      |
|                                |               | <b>Region</b>            | 1, 36  | 0.19   | 0.6623  |      |
|                                | <b>Yield</b>  | <b>Overall intercept</b> | 17     | 4.71   | 0.0002  | 64.7 |
|                                |               | <b>Region</b>            | 1, 16  | 0.01   | 0.9348  |      |
| <b>Bollgard II: Bollgard</b>   | <b>Counts</b> | <b>Overall intercept</b> | 16     | -1.82  | 0.087   |      |
|                                |               | <b>Plant part</b>        | 1, 9   | 1.68   | 0.2271  |      |
|                                |               | <b>Region</b>            | 1, 11  | 2.56   | 0.1379  |      |
|                                | <b>Damage</b> | <b>Overall intercept</b> | 36     | -8.21  | <0.0001 | 46.7 |
|                                |               | <b>Plant part</b>        | 1, 27  | 5.42   | 0.0277  |      |
|                                |               | <b>Bolls</b>             |        |        |         | 54.5 |
|                                |               | <b>Squares</b>           |        |        |         | 31.2 |
|                                |               | <b>Region</b>            | 2, 34  | 0.46   | 0.6366  |      |
|                                | <b>Yield</b>  | <b>Overall intercept</b> | 18     | 0.23   | 0.8215  |      |
|                                |               | <b>Region</b>            | n/e    | n/e    | n/e     |      |
| <b>Widestrike: Bollgard</b>    | <b>Counts</b> | <b>Overall intercept</b> | 9      | -1.87  | 0.095   |      |
|                                |               | <b>Plant part</b>        | n/e    | n/e    | n/e     |      |
|                                |               | <b>Region</b>            | n/e    | n/e    | n/e     |      |
|                                | <b>Damage</b> | <b>Overall intercept</b> | 18     | -2.70  | 0.0146  | 20.5 |
|                                |               | <b>Plant part</b>        | 1, 12  | 0.24   | 0.6327  |      |
|                                |               | <b>Region</b>            | 1, 17  | 0.01   | 0.9132  |      |
|                                | <b>Yield</b>  | <b>Overall intercept</b> | 7      | -0.47  | 0.6493  |      |
|                                |               | <b>Region</b>            | n/e    | n/e    | n/e     |      |
| <b>Bollgard II: WideStrike</b> | <b>Counts</b> | <b>Overall intercept</b> | 62     | -4.92  | <0.0001 | 17.9 |
|                                |               | <b>Plant part</b>        | 3, 59  | 0.91   | 0.4431  |      |
|                                |               | <b>Region</b>            | 1, 61  | 0.22   | 0.6417  |      |
|                                |               | <b>Year</b>              | 2, 60  | 13.45  | <0.0001 |      |
|                                |               | <b>Year*plant part</b>   | n/e    | n/e    | n/e     |      |
|                                |               | <b>Year*region</b>       | n/e    | n/e    | n/e     |      |
|                                | <b>Damage</b> | <b>Overall intercept</b> | 141    | -10.99 | <0.0001 | 33.4 |
|                                |               | <b>Plant part</b>        | 3, 138 | 0.76   | 0.5199  |      |
|                                |               | <b>Region</b>            | 1, 140 | 4.32   | 0.0394  |      |
|                                |               | <b>Midsouth</b>          |        |        |         | 30.2 |
|                                |               | <b>Southeast</b>         |        |        |         | 41.0 |
|                                |               | <b>Year</b>              | 2, 139 | 3.51   | 0.0326  |      |
|                                |               | <b>Year*plant part</b>   | 2, 93  | 0.74   | 0.4819  |      |
|                                |               | <b>Year*region</b>       | 2, 136 | 0.27   | 0.7611  |      |
|                                | <b>Yield</b>  | <b>Overall intercept</b> | 53     | 4.04   | 0.0002  | 6.8  |
|                                |               | <b>Region</b>            | 1, 52  | 8.41   | 0.0055  |      |

|                                  |                              |                               |                          |       |         |              |
|----------------------------------|------------------------------|-------------------------------|--------------------------|-------|---------|--------------|
|                                  |                              | <b>Midsouth<br/>Southeast</b> |                          |       |         | 12.4<br>2.8  |
|                                  |                              | <b>Year</b>                   | 2, 51                    | 0.99  | 0.3787  |              |
|                                  |                              | <b>Year*region</b>            | n/e                      | n/e   | n/e     |              |
| <b>WideStrike 3: Bollgard II</b> | <b>Counts</b>                | <b>Overall intercept</b>      | n/e                      | n/e   | n/e     |              |
|                                  |                              | <b>Plant part</b>             | n/e                      | n/e   | n/e     |              |
|                                  |                              | <b>Region</b>                 | n/e                      | n/e   | n/e     |              |
|                                  | <b>Damage</b>                | <b>Overall intercept</b>      | 16                       | 1.12  | 0.2792  |              |
|                                  |                              | <b>Plant part</b>             | 2, 12                    | 0.10  | 0.9036  |              |
|                                  |                              | <b>Region</b>                 | 1, 15                    | 0.00  | 0.9494  |              |
|                                  | <b>Yield</b>                 | <b>Overall intercept</b>      | 5                        | 2.89  | 0.034   | 12.7         |
|                                  |                              | <b>Region</b>                 | n/e                      | n/e   | n/e     |              |
|                                  | <b>Bollgard II: TwinLink</b> | <b>Counts</b>                 | <b>Overall intercept</b> | 10    | -3.73   | 0.0039       |
| <b>Plant part</b>                |                              |                               | 1, 9                     | 0.15  | 0.709   |              |
| <b>Region</b>                    |                              |                               | n/e                      | n/e   | n/e     |              |
| <b>Damage</b>                    |                              | <b>Overall intercept</b>      | 32                       | -2.73 | 0.0101  | 23.0         |
|                                  |                              | <b>Plant part</b>             | 2, 27                    | 2.25  | 0.1252  |              |
|                                  |                              | <b>Region</b>                 | 1, 31                    | 4.79  | 0.0363  |              |
|                                  |                              | <b>Midsouth<br/>Southeast</b> |                          |       |         | 10.6<br>40.8 |
| <b>Yield</b>                     |                              | <b>Overall intercept</b>      | 16                       | -0.65 | 0.5262  |              |
|                                  |                              | <b>Region</b>                 | 1, 15                    | 0.00  | 0.946   |              |
| <b>TwinLink: WideStrike</b>      | <b>Counts</b>                | <b>Overall intercept</b>      | 4                        | 2.51  | 0.0658  |              |
|                                  |                              | <b>Plant part</b>             | n/e                      | n/e   | n/e     |              |
|                                  |                              | <b>Region</b>                 | n/e                      | n/e   | n/e     |              |
|                                  | <b>Damage</b>                | <b>Overall intercept</b>      | 31                       | 5.77  | <0.0001 | 34.5         |
|                                  |                              | <b>Plant part</b>             | 2, 25                    | 1.52  | 0.2386  |              |
|                                  |                              | <b>Region</b>                 | 1, 30                    | 4.92  | 0.0342  |              |
|                                  |                              | <b>Midsouth<br/>Southeast</b> |                          |       |         | 28.2<br>49.3 |
|                                  | <b>Yield</b>                 | <b>Overall intercept</b>      | 15                       | -4.64 | 0.0003  | 11.8         |
|                                  |                              | <b>Region</b>                 | n/e                      | n/e   | n/e     |              |
| <b>WideStrike 3: WideStrike</b>  | <b>Counts</b>                | <b>Overall intercept</b>      | n/e                      | n/e   | n/e     |              |
|                                  |                              | <b>Plant part</b>             | n/e                      | n/e   | n/e     |              |
|                                  |                              | <b>Region</b>                 | n/e                      | n/e   | n/e     |              |
|                                  | <b>Damage</b>                | <b>Overall intercept</b>      | 34                       | 5.93  | <0.0001 | 38.6         |
|                                  |                              | <b>Plant part</b>             | 3, 31                    | 0.92  | 0.4445  |              |
|                                  |                              | <b>Region</b>                 | 1, 33                    | 8.59  | 0.0061  |              |
|                                  |                              | <b>Midsouth<br/>Southeast</b> |                          |       |         | 28.5<br>55.1 |
|                                  | <b>Yield</b>                 | <b>Overall intercept</b>      | 7                        | -0.28 | 0.7903  |              |
|                                  |                              | <b>Region</b>                 | n/e                      | n/e   | n/e     |              |

| <b>WideStrike 3: TwinLink</b> | <b>Counts</b> | <b>Overall intercept</b> | n/e   | n/e  | n/e    |     |
|-------------------------------|---------------|--------------------------|-------|------|--------|-----|
|                               |               | <b>Plant part</b>        | n/e   | n/e  | n/e    |     |
|                               |               | <b>Region</b>            | n/e   | n/e  | n/e    |     |
|                               | <b>Damage</b> | <b>Overall intercept</b> | 15    | 1.12 | 0.2783 |     |
|                               |               | <b>Plant part</b>        | 1, 8  | 0.23 | 0.6431 |     |
|                               |               | <b>Region</b>            | 1, 14 | 0.02 | 0.8768 |     |
|                               | <b>Yield</b>  | <b>Overall intercept</b> | 5     | 4.67 | 0.0055 | 8.2 |
|                               |               | <b>Region</b>            | n/e   | n/e  | n/e    |     |

<sup>1</sup>Technology<sub>1</sub> : Technology<sub>2</sub>

<sup>2</sup>Where df only displays one value, it is the denominator degrees of freedom and the test was a t-test.

<sup>3</sup>Percent reduction of counts or damage or percent increase of yield by Technology<sub>1</sub> vs. Technology<sub>2</sub> for significant comparisons not including year effects for regression analyses.

n/e= data was not estimatable due to a lack of available comparisons.
